# Supplementary material
Source: PubMed Central journal article supplement (PMC4003468)
Supplement: Supp_Fig1.pdf [file Supp_Fig1.pdf]

## Non-DOX-treated control rats

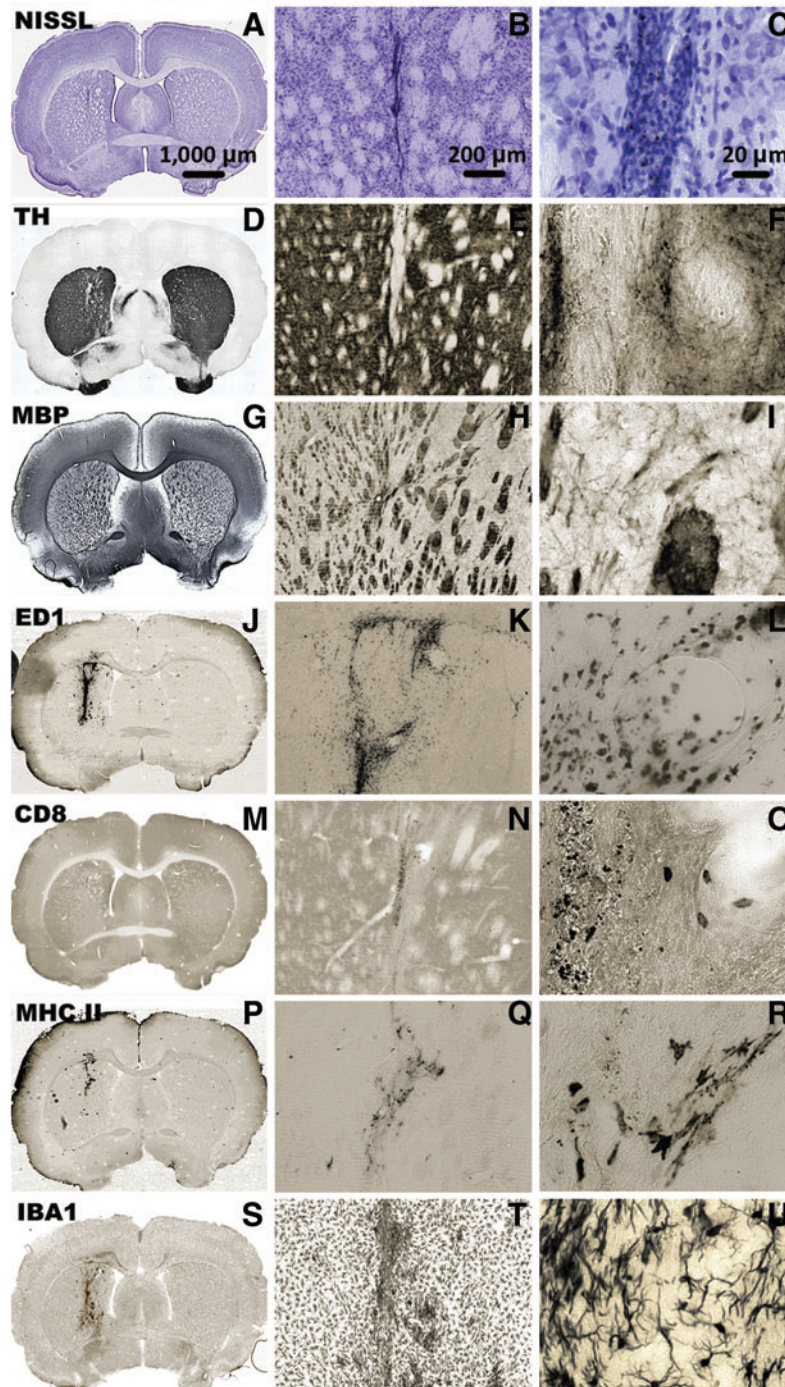

**SUPPLEMENTARY FIG. S1.** Neuropathology analysis of non-DOX-treated control rats injected with  $1 \times 10^9$  viral particles of HC-Ad-TetOn-Flt3L into the striatum. Rats were gavaged daily for 14 days with double-distilled water. Brains were sectioned and stained for NISSL to show gross morphology (A–C), tyrosine hydroxylase (TH) to label striatal dopaminergic fibers (D–F), myelin basic protein (MBP) to label oligodendrocytes and myelin sheaths (G–I), ED1 to label macrophages and activated microglia (J–L), CD8<sup>+</sup>T cells (M–O), MHC-II to label MHC-II macrophages, microglia, and immune cells (P–R), and IBA1 to label activated macrophages and microglia (S–U). Scale bar: 1,000  $\mu\text{m}$  for full brain sections, 200  $\mu\text{m}$  for 5 $\times$  images, and 20  $\mu\text{m}$  for 40 $\times$  images.
