# Supplementary material
Source: PubMed Central journal article supplement (PMC4003468)
Supplement: Supp_Fig2.pdf [file Supp_Fig2.pdf]

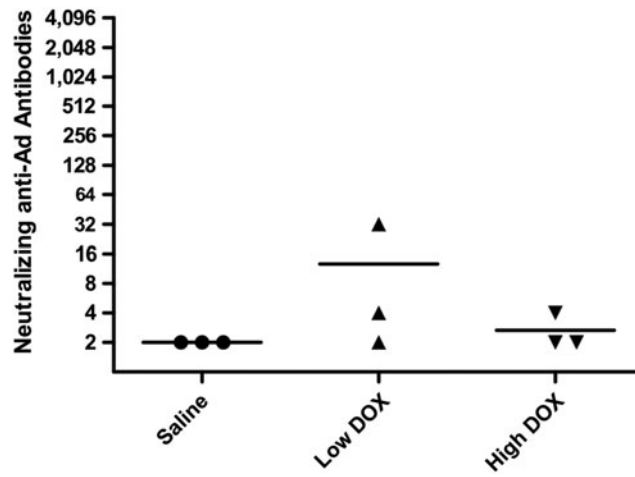

**SUPPLEMENTARY FIG. S2.** Anti-adenovirus-neutralizing antibodies in the plasma of HC-Ad-treated rats. The presence of anti-adenovirus-neutralizing antibodies in the plasma of rats treated with low (30.80 mg/kg/day) and high (46.20 mg/kg/day) concentrations of DOX followed by intracranial injections of HC-Ad-TetOn-Flt3L is shown. DOX was administered twice daily 2 days before surgery until 14 days postsurgery. The saline group was injected intracranially with saline and received no DOX treatment. No statistical difference was found between the saline group and either DOX dose groups (Kruskal–Wallis test,  $p > 0.05$ ). All titers were below positive levels (titers lower than 128 are considered negative).
